# Supplementary material
Source: publisher figshare collection journal article supplement (https://springernature.figshare.com/ndownloader/files/15588866)
Supplement: Supplementary file 1 [file 15588866]

Table A3 Cross-provincial natural gas pipelines in China (2017)

| Name | Transmission capability (bcm/year) | Related provinces |
| --- | --- | --- |
| Sinopec | | |
| Sichuan to eastern | 120 | sc, cq, hb, ah, js, zhe, sh |
| Yuji line | 30 | sn, sx, ha, sd |
| Anji line | 30 | he, sd |
| Zhongji line | 4 | ha, sd |
| CNPC | | |
| Shanjing 1st | 30 | sn, sx, he, bj |
| Shanjing 2nd | 170 | sn, sx, he, bj |
| Shanjing 3rd | 150 | sn, sx, he, bj |
| Shanjing 4th | 200 | sn, nm, he, bj |
| Yongtangqin | 147 | he, tj |
| Zhongcang line | 10 | ha, sd, he |
| Cangzi line | 10.5 | he, sd |
| Qinshen line | 90 | he, ln |
| Hashen line | 100 | hl, jl, ln |
| Jining line | 110 | he, sd |
| Yasuoji line | 4.2 | he, tj |
| Seninglan line | 34 | qh, gs |
| Xiqidongshu 1st west | 170 | xj, gs |
| Xiqidongshu 3rd west | 300 | xj, gs, nx |
| Seninglan 2nd | 35 | qh, gs |
| Xiqidongshu 2nd west | 300 | xj, gs, nx |
| Xiqidongshu 3rd east | 150 | jx, fj |
| Zhonggui line | 150 | nx, gs, sn, sc, cq, gz |
| Zhongmian line | 100 | yn, gz, gx |
| Xiqidongshu 1st east | 170 | gs, nx, sn, sx, ha, ah, js, sh |
| Nanwu line | 16.7 | js, ah |
| Changchang line | 17.9 | js, zj |
| Baogang line | 20 | js, sh |
| Huaiwu line | 22 | ha, hb |
| Changing line | 10.8 | nx, sn |
| Zhognwu line | 70 | cq, hb, hn |
| Xiqidongshu 2nd east |  |  |
| Zhognwei-Huangpi | 280 | nx, gs, sn, ha, hb |
| Huangpi-Guangdong | 250 | hb, jx, gd |
| Zhangshu-Xiangtan | 40 | jx, hn |
| Nanchang-Shanghai | 100 | jx, zj |
| Nanchang-Shanghai | 100 | zj, sh |
| Guangnan line | 100 | gd, gx |
| Other companies | | |
| Kegu line | 40 | nm, bj |
| Mengxi line | 80 | sx, nm, he, bj |
